# Supplementary material for: Effect of Copper-Modification of g-C3N4 on the Visible-Light-Driven Photocatalytic Oxidation of Nitrophenols
Source: MDPI journal article supplement (doi:10.3390/molecules28237810), 2023-11-27
Supplement: s1 [file s1]

## Supplementary Materials

for

# Effect of Copper-Modification of g-C<sub>3</sub>N<sub>4</sub> on the Visible-Light-Driven Photocatalytic Oxidation of Nitrophenols

Truong Nguyen Xuan <sup>1</sup>, Dien Nguyen Thi <sup>2</sup>, Quang Tran Thuong <sup>1</sup>, Tue Nguyen Ngoc <sup>1</sup>, Khanh Dang Quoc <sup>3</sup>, Zsombor Molnár <sup>4</sup>, Shoaib Mukhtar <sup>5</sup>, Erzsébet Szabó-Bárdos <sup>5</sup>, and Ottó Horváth <sup>5,\*</sup>

<sup>1</sup> School of Chemistry and Life Sciences, Hanoi University of Science and Technology, No.1 Dai Co Viet street, Hai Ba Trung distric, Hanoi 100000, Vietnam; truong.nguyensexuan@hust.edu.vn (T.N.X.); quang.tranthuong@hust.edu.vn (Q.T.T.); tue.nguyenngoc@hust.edu.vn (T.N.N.)

<sup>2</sup> Viettel Aerospace Institute, Viettel Group, Hoa Lac high-tech park, Thach That distric, Hanoi 10000, Vietnam; dienn15@viettel.com.vn (D.N.T.)

<sup>3</sup> School of Materials Science and Engineering, Hanoi University of Science and Technology, No.1 Dai Co Viet street, Hai Ba Trung distric, Hanoi 100000, Vietnam; khanh.dangquoc@hust.edu.vn

<sup>4</sup> Environmental Mineralogy Research Group, Research Institute of Biomolecular and Chemical Engineering, University of Pannonia, H-8210 Veszprém, POB. 1158, Hungary; molnar.zsombor@mk.uni-pannon.hu (Z.M.)

<sup>5</sup> Research Group of Environmental and Inorganic Photochemistry, Center for Natural Sciences, Faculty of Engineering, University of Pannonia, P.O.B. 1158, Veszprém H-8210, Hungary

\* Correspondence: horvath.otto@mk.uni-pannon.hu; Tel+36-88-624-000 / 6049 ext

---

### Table of content

|                                  |   |
|----------------------------------|---|
| Figures S1 and S2, Table S1..... | 2 |
| Figures S3 and S4.....           | 3 |
| Figures S5 and S6.....           | 4 |
| Figures S7 and S8.....           | 5 |

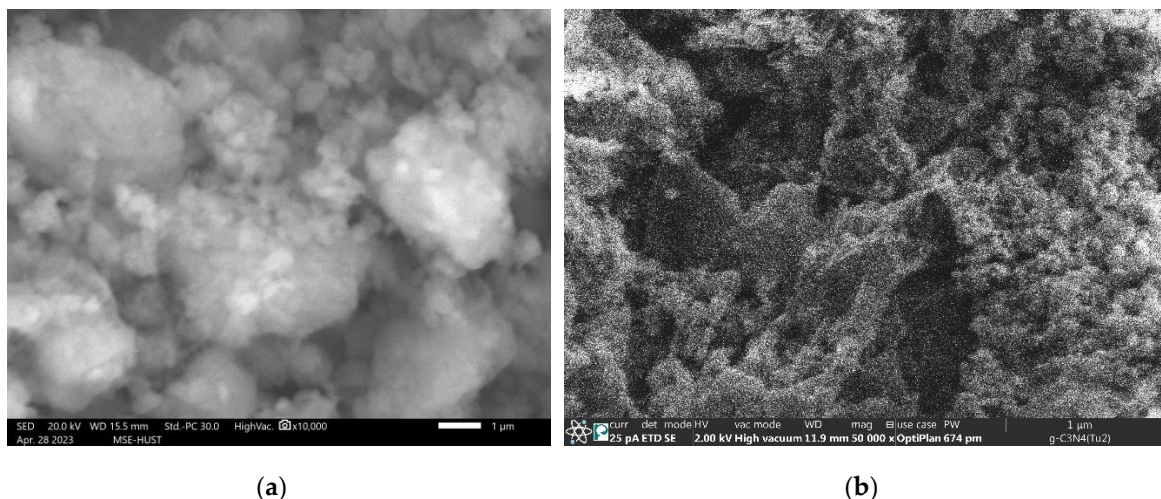

**Figure S1.** SEM images of catalyst materials 3% Cu/g-C<sub>3</sub>N<sub>4</sub> (a) and g-C<sub>3</sub>N<sub>4</sub> (b) at 10 000× magnification.

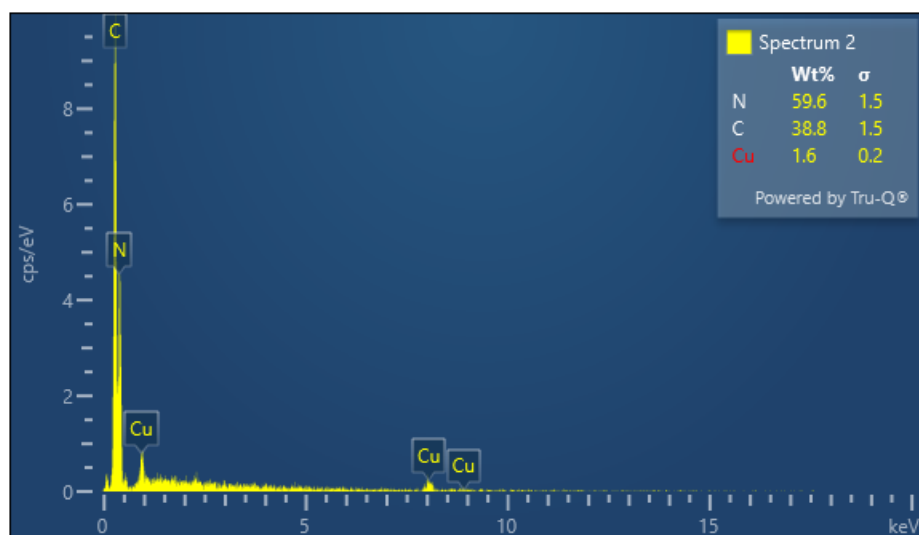

**Figure S2.** EDS spectrum of the 3% Cu/g-C<sub>3</sub>N<sub>4</sub> sample (SEM).

**Table S1.** XPS surface composition (at.%) of the 3% Cu/g-C<sub>3</sub>N<sub>4</sub> sample.

| Element | Surface ratios (at.%) |
|---------|-----------------------|
| O 1s    | 39.9                  |
| N 1s    | 51.8                  |
| C 1s    | 39.9                  |
| Cu 2p   | 3.7                   |
| N/Cu    | 14.0                  |

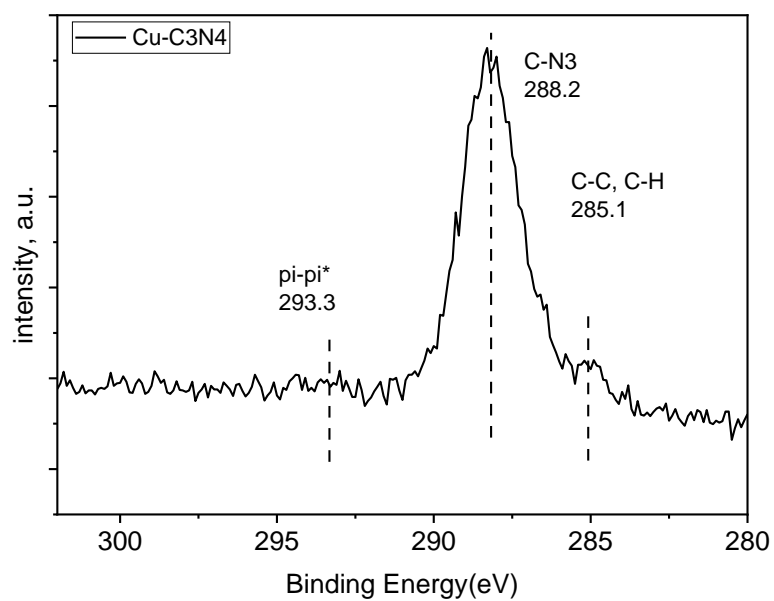

**Figure S3.** The C 1s binding energy region in the XPS of the 3% Cu/g-C<sub>3</sub>N<sub>4</sub> sample.

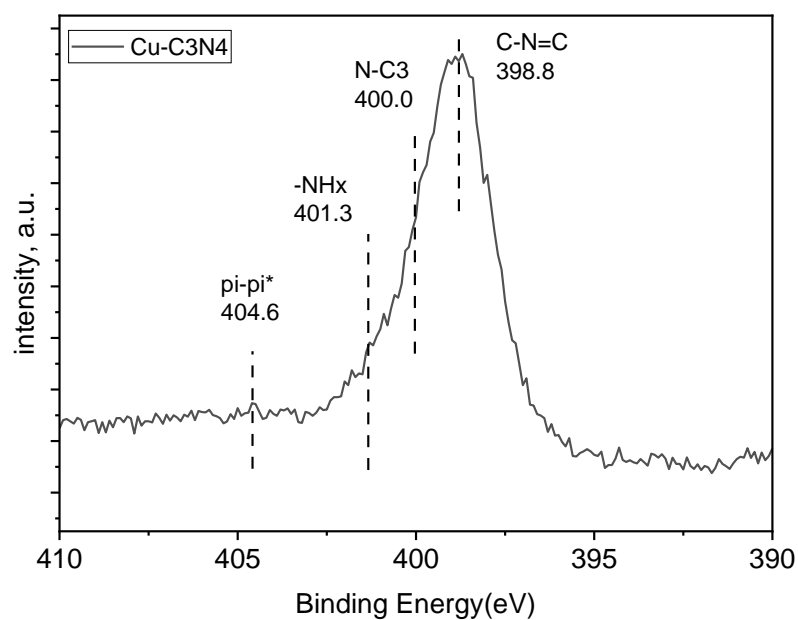

**Figure S4.** The N 1s binding energy region in the XPS of the 3% Cu/g-C<sub>3</sub>N<sub>4</sub> sample.

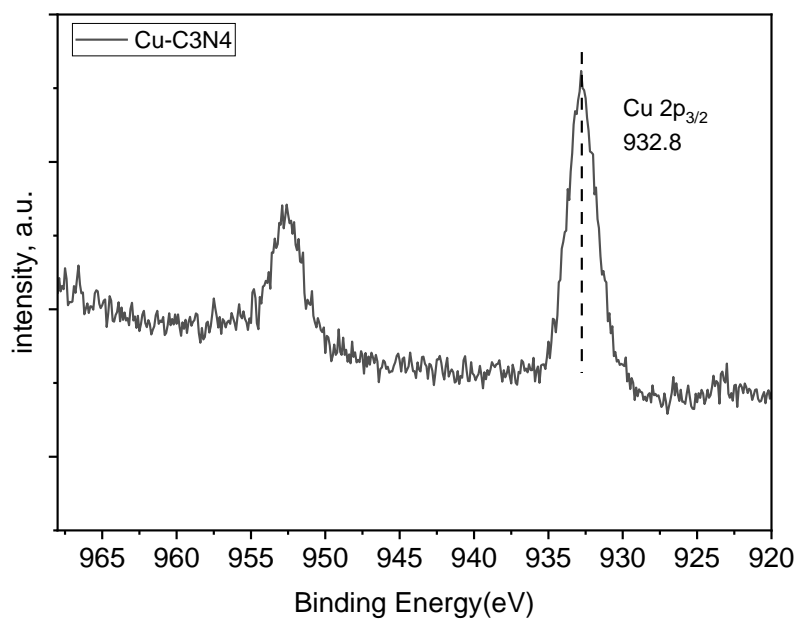

**Figure S5.** The Cu 2p binding energy region in the XPS of the 3% Cu/g-C<sub>3</sub>N<sub>4</sub> sample.

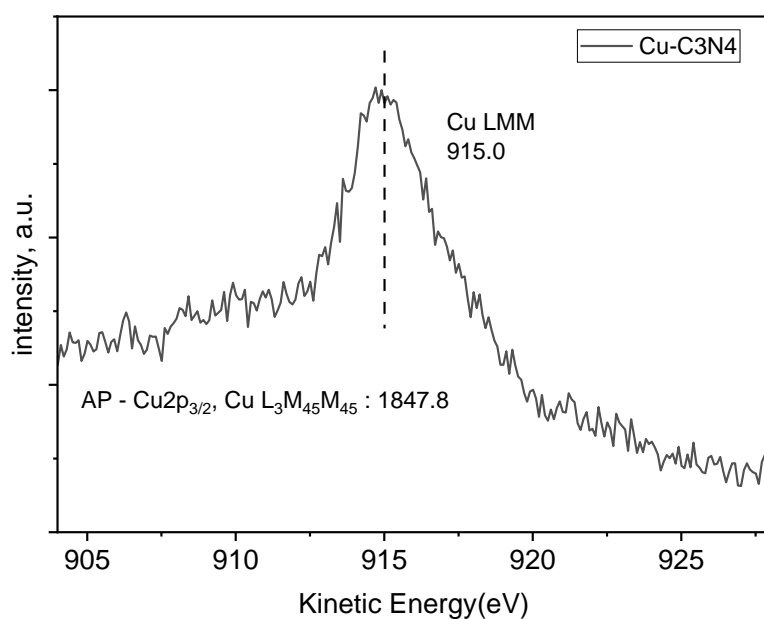

**Figure S6.** Cu LMM Auger peak and modified Auger parameter of the 3% Cu/g-C<sub>3</sub>N<sub>4</sub> sample.

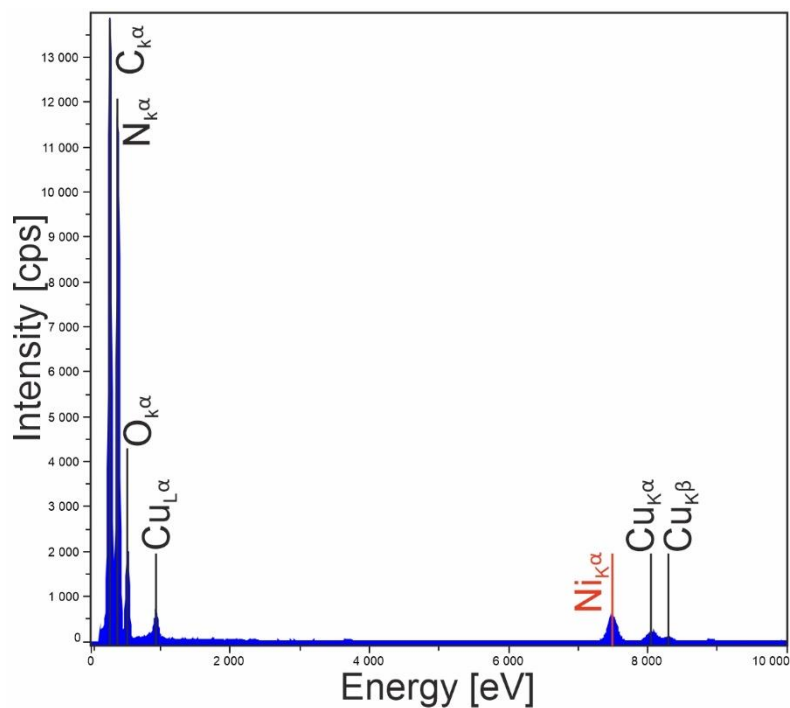

**Figure S7.** EDS spectrum of the 3% Cu/g-C<sub>3</sub>N<sub>4</sub> sample (TEM).

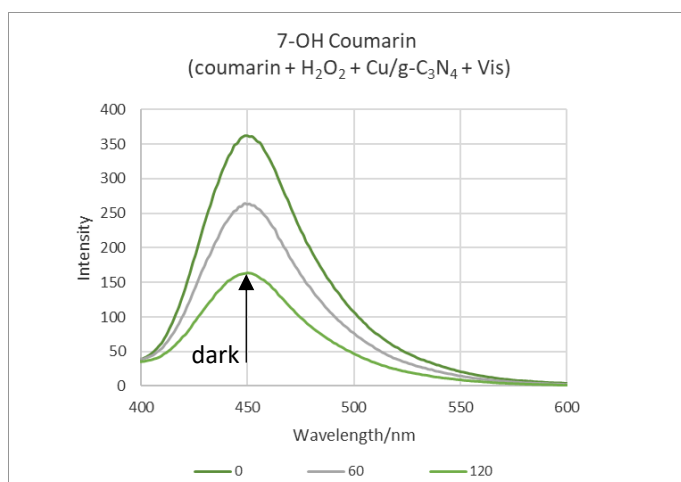

**Figure S8.** Formation of 7-hydroxy-coumarin upon visible-light irradiation (for 120 min) in the presence of 3% Cu/g-C<sub>3</sub>N<sub>4</sub> catalyst. Before starting the irradiation, the reaction mixture was kept in dark for 5 hours.
